# Supplementary material for: Structural rule of N-coordinated single-atom catalysts for electrochemical CO2 reduction
Source: Royal Society of Chemistry journal article supplement (doi:10.1039/d1ta09015a), 2022-01-01
Supplement: d1ta09015a1.pdf [file d1ta09015a1.pdf]

## Supporting Information

### Structural Rule of N-Coordinated Single Atomic Catalysts for

### Electrochemical CO<sub>2</sub> Reduction

Zhenxin Lou<sup>a</sup>, Wenjing Li<sup>a</sup>, Haiyang Yuan<sup>\*ab</sup>, Yu Hou<sup>a</sup>, Huagui Yang<sup>a</sup>, Haifeng Wang<sup>\*b</sup>

<sup>a</sup>Key Laboratory for Ultrafine Materials of Ministry of Education, Shanghai Engineering Research Center of Hierarchical Nanomaterials, School of Materials Science and Engineering, East China University of Science and Technology, Shanghai 200237, China.

<sup>b</sup>Key Laboratory for Advanced Materials, Research Institute of Industrial Catalysis and Center for Computational Chemistry, School of Chemistry and Molecular Engineering, East China University of Science and Technology, Shanghai, 200237, China.

\*Emails: hfwang@ecust.edu.cn; hyyuan@ecust.edu.cn

## Note S1. Computational Methodology

The electrochemical conversion of CO<sub>2</sub> into CO (CO<sub>2</sub>RR) involves the transfer of two proton-coupled electron pairs and three key intermediates (\*CO<sub>2</sub>, \*COOH and \*CO), whose four elementary steps can be written as:

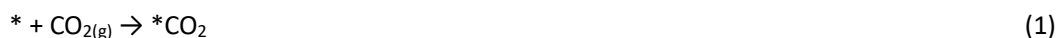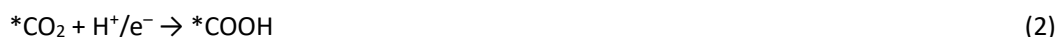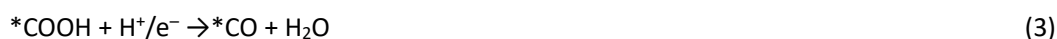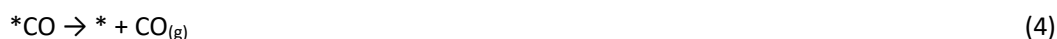

Here, we calculated the adsorption energies of the key intermediates in the CO<sub>2</sub>RR process with the formula:  $E_{\text{ads}}(\text{X}) = E_{\text{X}/\text{surf}} - E_{\text{surf}} - E_{\text{X}}$ , where  $E_{\text{X}/\text{surf}}$ ,  $E_{\text{surf}}$  and  $E_{\text{X}}$  represent the energies of the surface with adsorbates, the clean substrate, and adsorbates, respectively. For \*COOH,  $E_{\text{ads}}(*\text{COOH})$  was calculated by reference to the energies of CO<sub>2</sub> and 1/2H<sub>2</sub> according to the computational hydrogen electrode (CHE) model. The more negative  $E_{\text{ads}}(\text{X})$  indicates the stronger binding strength between adsorbates and the surface.

The Gibbs free energy changes ( $\Delta G$ ) of elementary steps in CO<sub>2</sub>RR were calculated using the CHE model. In this approach, the chemical potentials of a proton-electron pair (H<sup>+</sup>/e<sup>-</sup>) and half H<sub>2</sub> molecule are equilibrated at 0 V (vs. the reversible hydrogen electrode, RHE) at all pH values.<sup>1, 2</sup> The effect of the potential on the state with an electron involved was considered by shifting the energy of  $-eU$ . Therefore, after obtaining the adsorption energy of the key intermediates, the corresponding Gibbs free energy change ( $\Delta G_i$ ) of each elementary step in CO<sub>2</sub>RR at the potential  $U$  can be calculated as follows:

$$\Delta G_1 = E(*\text{CO}_2) - E(*) - E(\text{CO}_{2(\text{g})}) + (\Delta E_{\text{ZPE}} - T\Delta S) \quad (5)$$

$$= E_{\text{ads}}(*\text{CO}_2) + (\Delta E_{\text{ZPE}} - T\Delta S)$$

$$\Delta G_2 = E(*\text{COOH}) - E(*\text{CO}_2) - E(\text{H}_2)/2 + (\Delta E_{\text{ZPE}} - T\Delta S) + eU \quad (6)$$

$$= E_{\text{ads}}(*\text{COOH}) - E_{\text{ads}}(*\text{CO}_2) + (\Delta E_{\text{ZPE}} - T\Delta S) + eU$$

$$\Delta G_3 = E(*\text{CO}) + E(\text{H}_2\text{O}) - E(*\text{COOH}) - E(\text{H}_2)/2 + (\Delta E_{\text{ZPE}} - T\Delta S) + eU \quad (7)$$

$$= E_{\text{ads}}(*\text{CO}) - E_{\text{ads}}(*\text{COOH}) + (\Delta E_{\text{ZPE}} - T\Delta S) + \Delta G_0 + eU$$

$$\Delta G_4 = E(*) + E(\text{CO}_{(\text{g})}) - E(*\text{CO}) + (\Delta E_{\text{ZPE}} - T\Delta S) \quad (8)$$

$$= -E_{\text{ads}}(*\text{CO}) + (\Delta E_{\text{ZPE}} - T\Delta S)$$

where  $E_{\text{ads}}(*\text{CO}_2)$ ,  $E_{\text{ads}}(*\text{COOH})$  and  $E_{\text{ads}}(*\text{CO})$  are the adsorption energies of \*CO<sub>2</sub>, \*COOH and \*CO, and  $\Delta G_0$  is the Gibbs free energy of CO<sub>2</sub>RR to CO from the experiment (CO<sub>2</sub> + H<sub>2</sub> → CO + H<sub>2</sub>O,  $\Delta G_0 = 0.67$  eV).  $\Delta E_{\text{ZPE}}$  and  $T\Delta S$  are the differences of the zero-point energy and entropic contributions (see the detailed data in Table S2), which result from the experimental data and vibrational frequency calculations at 298 K. Theoretically, the reaction maximum Gibbs free energy ( $\Delta G_{\text{CO}_2\text{RR}}$ ) of the elementary steps in CO<sub>2</sub>RR is often used to evaluate the intrinsic activities of catalysts, which can be written as  $\Delta G_{\text{CO}_2\text{RR}} = \max \{\Delta G_1, \Delta G_2, \Delta G_3, \Delta G_4\}$

With respect to the effect of the solution, we employed the implicit CANDLE solvation model by JDFTx software upon all structures, using the Garrity–Bennett–Rabe–Vanderbilt (GBRV) ultrasoft pseudopotentials (USPP).<sup>3, 4</sup> We corrected the solvation energy resulting from JDFTx into Gibbs free energy change ( $\Delta G_i$ ) of each elementary step in CO<sub>2</sub>RR to estimate the effect of solvent. Taking Co, W and Ru GN<sub>x</sub> SACs (x = 2, 3, 4) as examples, Table S3 lists  $\Delta G_i$  with or without solvent involved and the corresponding difference ( $\Delta$ , i.e., the solvation correction). It can be observed that all  $\Delta$  are around or even smaller than 0.1 eV, which contributes a little effect to the qualitative identification

of the activity trend of TM-GN<sub>x</sub> (x = 2, 3, 4). Therefore, the solvent-induced effect toward the related adsorbates is small, and contributes little effect to the tendency judgment.

**Table S1.** The specific applied  $U$ - $J$  value ( $U_{\text{eff}}$ ) of  $3d$  metals for DFT calculations.<sup>6</sup>

| $3d$             | Cr   | Mn   | Fe   | Co   | Ni   |
|------------------|------|------|------|------|------|
| $U_{\text{eff}}$ | 2.79 | 3.06 | 3.29 | 3.42 | 3.40 |

**Table S2.** Zero-point energies ( $E_{\text{ZPE}}$ ) and entropies ( $TS$ ) of gas molecules and key intermediates at 298 K.

|                     | Species          | $E_{\text{ZPE}}$ | $TS$ |
|---------------------|------------------|------------------|------|
|                     | H <sub>2</sub> O | 0.57             | 0.67 |
|                     | H <sub>2</sub>   | 0.27             | 0.41 |
|                     | CO <sub>2</sub>  | 0.13             | 0.66 |
|                     | CO               | 0.07             | 0.61 |
|                     | *                | 0.32             | 0.10 |
|                     | *CO <sub>2</sub> | 0.63             | 0.40 |
| TM- GN <sub>2</sub> | *COOH            | 0.93             | 0.29 |
|                     | *CO              | 0.55             | 0.23 |
|                     | *H               | 0.49             | 0.00 |
|                     | *                | 0.48             | 0.13 |
|                     | *CO <sub>2</sub> | 0.77             | 0.27 |
| TM- GN <sub>3</sub> | *COOH            | 1.08             | 0.33 |
|                     | *CO              | 0.66             | 0.35 |
|                     | *H               | 0.66             | 0.00 |
|                     | *                | 0.60             | 0.16 |
|                     | *CO <sub>2</sub> | 0.88             | 0.32 |
| TM- GN <sub>4</sub> | *COOH            | 1.22             | 0.32 |
|                     | *CO              | 0.81             | 0.33 |
|                     | *H               | 0.76             | 0.00 |

**Table S3.** Gibbs free energy change ( $\Delta G$ ) of each elementary step of CO<sub>2</sub>RR into CO on TM-GN<sub>x</sub> with or without solvent involved, and the corresponding difference ( $\Delta$ ). The unit is eV.

|                 |                 |                 | * + CO <sub>2</sub> (g)<br>→ *CO <sub>2</sub> | *CO <sub>2</sub> + H <sup>+</sup> /e <sup>-</sup><br>→ *COOH | *COOH + H <sup>+</sup> /e <sup>-</sup><br>→ *CO + H <sub>2</sub> O | *CO → * +<br>CO(g) |              |
|-----------------|-----------------|-----------------|-----------------------------------------------|--------------------------------------------------------------|--------------------------------------------------------------------|--------------------|--------------|
| Co              | GN <sub>2</sub> | no-solvent      | 0.38                                          | 0.45                                                         | -0.66                                                              | 0.59               |              |
|                 |                 | solvent         | 0.36                                          | 0.35                                                         | -0.79                                                              | 0.62               |              |
|                 |                 | <b>Δ</b>        | <b>-0.02</b>                                  | <b>-0.11</b>                                                 | <b>-0.13</b>                                                       | <b>0.03</b>        |              |
|                 | GN <sub>3</sub> | no-solvent      | 0.32                                          | -0.11                                                        | -1.06                                                              | 1.62               |              |
|                 |                 | solvent         | 0.33                                          | -0.19                                                        | -1.15                                                              | 1.54               |              |
|                 |                 | <b>Δ</b>        | <b>0.01</b>                                   | <b>-0.07</b>                                                 | <b>-0.09</b>                                                       | <b>-0.08</b>       |              |
|                 | GN <sub>4</sub> | no-solvent      | 0.38                                          | 0.72                                                         | -0.27                                                              | -0.06              |              |
|                 |                 | solvent         | 0.32                                          | 0.67                                                         | -0.34                                                              | -0.12              |              |
|                 |                 | <b>Δ</b>        | <b>-0.06</b>                                  | <b>-0.04</b>                                                 | <b>-0.07</b>                                                       | <b>-0.06</b>       |              |
|                 | Ru              | GN <sub>2</sub> | no-solvent                                    | 0.27                                                         | -0.28                                                              | -0.88              | 1.65         |
|                 |                 |                 | solvent                                       | 0.31                                                         | -0.39                                                              | -1.01              | 1.63         |
|                 |                 |                 | <b>Δ</b>                                      | <b>0.04</b>                                                  | <b>-0.12</b>                                                       | <b>-0.13</b>       | <b>-0.02</b> |
| GN <sub>3</sub> |                 | no-solvent      | -0.30                                         | -0.09                                                        | -0.78                                                              | 1.94               |              |
|                 |                 | solvent         | -0.27                                         | -0.22                                                        | -0.87                                                              | 1.89               |              |
|                 |                 | <b>Δ</b>        | <b>0.04</b>                                   | <b>-0.12</b>                                                 | <b>-0.10</b>                                                       | <b>-0.05</b>       |              |
| GN <sub>4</sub> |                 | no-solvent      | 0.03                                          | 0.04                                                         | -1.33                                                              | 2.03               |              |
|                 |                 | solvent         | -0.08                                         | -0.05                                                        | -1.43                                                              | 2.10               |              |
|                 |                 | <b>Δ</b>        | <b>-0.11</b>                                  | <b>-0.09</b>                                                 | <b>-0.10</b>                                                       | <b>0.07</b>        |              |
| W               |                 | GN <sub>2</sub> | no-solvent                                    | 0.18                                                         | -0.14                                                              | -1.03              | 1.75         |
|                 |                 |                 | solvent                                       | 0.25                                                         | -0.28                                                              | -1.12              | 1.68         |
|                 |                 |                 | <b>Δ</b>                                      | <b>0.08</b>                                                  | <b>-0.14</b>                                                       | <b>-0.10</b>       | <b>-0.07</b> |
|                 | GN <sub>3</sub> | no-solvent      | -0.77                                         | -0.26                                                        | -0.30                                                              | 2.09               |              |
|                 |                 | solvent         | -0.70                                         | -0.39                                                        | -0.42                                                              | 2.04               |              |
|                 |                 | <b>Δ</b>        | <b>0.06</b>                                   | <b>-0.13</b>                                                 | <b>-0.12</b>                                                       | <b>-0.05</b>       |              |
|                 | GN <sub>4</sub> | no-solvent      | -0.26                                         | -0.54                                                        | -0.41                                                              | 1.97               |              |
|                 |                 | solvent         | -0.34                                         | -0.51                                                        | -0.52                                                              | 1.90               |              |
|                 |                 | <b>Δ</b>        | <b>-0.08</b>                                  | <b>0.03</b>                                                  | <b>-0.11</b>                                                       | <b>-0.07</b>       |              |

### Note S2. Stability of TM-GN<sub>x</sub>

The formation energy ( $E_f$ ) and dissolution potential ( $U_{\text{diss}}$ ) of TM-GN<sub>x</sub> ( $x = 2, 3, 4$ ) were examined, which can be used to assess the thermodynamic and electrochemical stabilities, respectively. The relevant formulas are as follows:<sup>5</sup>

$$E_f = E_b - E_c = (E_{\text{TM-GN}} - E_{\text{GN}} - E_{\text{TM}}) - E_c \quad (9)$$

$$U_{\text{diss}} = U_{\text{diss}}^0 - E_f/(ne) \quad (10)$$

where  $E_b$  and  $E_c$  are the binding energy of metal center (TM) with substrate and the cohesive energy of metal;  $E_{\text{TM-GN}}$ ,  $E_{\text{M-GN}}$ ,  $E_{\text{GN}}$  and  $E_{\text{M}}$  are the energies of the substrate GN with single metal atom anchored, pure substrate GN and single metal atom, respectively;  $n$  is the number of electrons involved in the dissolution process;  $U_{\text{diss}}^0$  is the standard dissolution potential of metal from experiments.<sup>5</sup>

According to the definition, the more negative  $E_f$  and more positive  $U_{\text{diss}}$  means the more superior thermodynamic and electrochemical stabilities, respectively<sup>5</sup>. From Figure S1, we can see that TM-GN<sub>4</sub> generally has the best thermodynamic and electrochemical stability compared to M-GN<sub>2</sub> and M-GN<sub>3</sub> ( $E_{\text{TM-GN}_4} > E_{\text{TM-GN}_2} > E_{\text{TM-GN}_3}$ ), which have the most negative  $E_f$  and positive  $U_{\text{diss}}$ . This result can be rationalized from the structural properties of GN<sub>x</sub> ( $x = 2 \sim 4$ ). Structurally, both GN<sub>2</sub> (or GN<sub>4</sub>) are the coplanar topological structure; TM on GN<sub>2</sub> is in the linear configuration bonded by two N atoms, while on GN<sub>4</sub>, TM is saturated by four N atoms. Thus, the interaction of metal center with GN<sub>2</sub> is relatively weaker than that with GN<sub>4</sub>, which is well demonstrated by the stronger  $E_b$  and shorter TM-N bonds, as Table S4 illustrates. For GN<sub>3</sub>, due to the relatively narrow space, the metal center is pushed out of the graphene layer, forming a tapered configuration with a relatively weak interaction, which would be easy to transfer and agglomerate with each other on nitrogen-doped carbons.

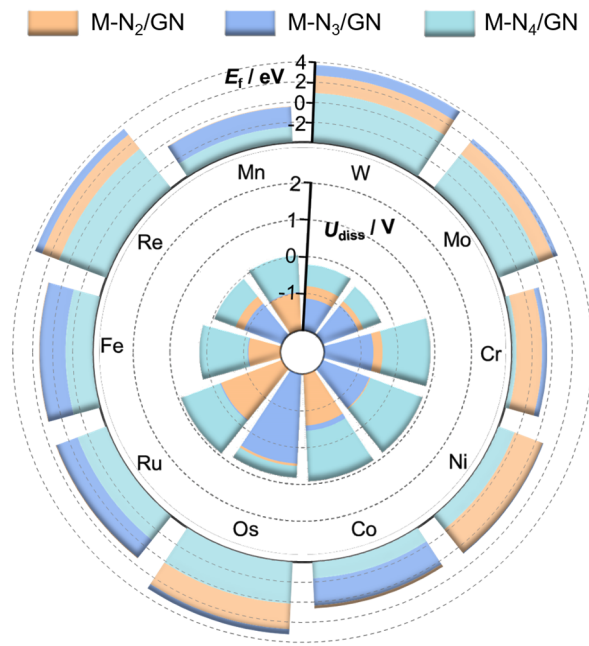

**Figure S1.** Calculated formation energies ( $E_f$ ) and dissolution potential ( $U_{diss}$ ) of different TM-GN<sub>x</sub>, where orange, blue and green represent TM-GN<sub>x</sub> (x = 2, 3, 4), respectively.



**Table S4.** Calculated binding energies ( $E_b$ ) and bond length of TM with GN<sub>2</sub> and GN<sub>4</sub>.  $E_b$  was calculated according to the following formula:  $E_b = E_{\text{TM/sub}} - E_{\text{sub}} - E_{\text{TM}}$ , where  $E_{\text{TM/sub}}$ ,  $E_{\text{sub}}$  and  $E_{\text{TM}}$  are the energies of the substrate with metal atom anchored, substrates (GN<sub>2</sub> and GN<sub>4</sub>) and single metal atom., respectively.

|    | $E_b$ (eV)      |                 | TM-N Bond (Å)   |                 |
|----|-----------------|-----------------|-----------------|-----------------|
|    | GN <sub>2</sub> | GN <sub>4</sub> | GN <sub>2</sub> | GN <sub>4</sub> |
| Cr | -5.09           | -7.68           | 1.975           | 1.961           |
| Mn | -3.33           | -5.38           | 1.950           | 1.909           |
| Fe | -2.92           | -5.58           | 2.148           | 1.908           |
| Co | -3.76           | -6.78           | 1.892           | 1.889           |
| Ni | -3.73           | -6.74           | 1.904           | 1.882           |
| Mo | -4.96           | -6.47           | 2.041           | 2.038           |
| Ru | -5.36           | -7.67           | 1.982           | 1.972           |
| W  | -6.21           | -7.97           | 2.015           | 2.001           |
| Re | -5.16           | -6.98           | 2.005           | 1.969           |
| Os | -5.46           | -8.02           | 1.977           | 1.941           |

**Table S5.** Calculated cohesive energies ( $E_c$ ) and the corresponding experimental ( $E_c^{\text{exp.}}$ ) values.

| Metal | $E_c$ | $E_c^{\text{exp.}}$ |
|-------|-------|---------------------|
| Ti    | -5.54 | -4.85               |
| Zr    | -6.38 | -6.25               |
| Hf    | -6.54 | -6.44               |
| V     | -6.33 | -5.31               |
| Nb    | -6.92 | -7.57               |
| Ta    | -8.17 | -8.10               |
| Cr    | -4.16 | -4.10               |
| Mo    | -6.26 | -6.82               |
| W     | -8.41 | -8.90               |
| Mn    | -3.99 | -2.92               |
| Re    | -7.82 | -8.03               |
| Fe    | -4.76 | -4.28               |
| Ru    | -7.19 | -6.74               |
| Os    | -8.31 | -8.17               |
| Co    | -5.21 | -4.39               |
| Rh    | -5.95 | -5.75               |
| Ir    | -7.28 | -6.94               |
| Ni    | -5.17 | -4.44               |
| Pd    | -3.70 | -3.89               |
| Pt    | -5.43 | -5.84               |
| Cu    | -3.86 | -3.49               |
| Au    | -3.62 | -3.81               |
| Ag    | -2.95 | -2.95               |

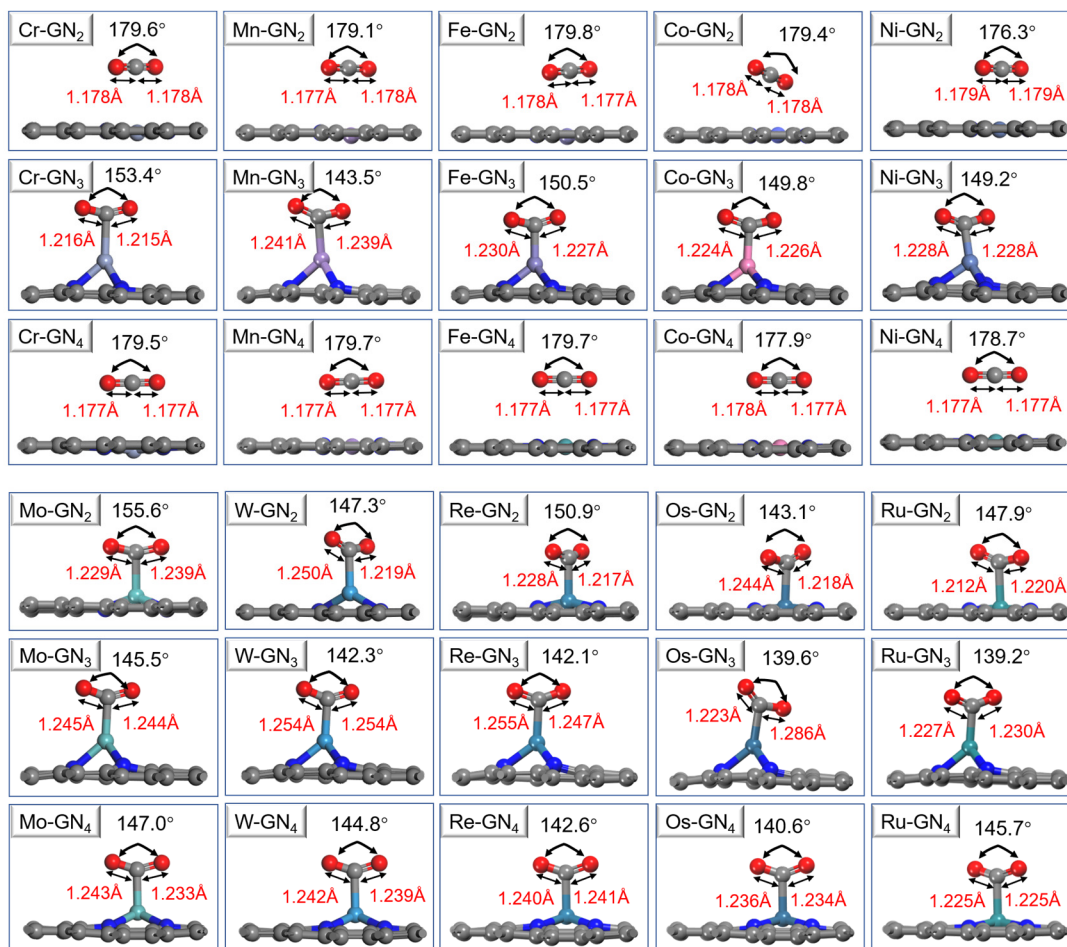

**Figure S2.** Adsorption configurations of CO<sub>2</sub> on the transition metal SACs anchored on nitrogen-doped graphene (TM-GN<sub>x</sub>, x = 2, 3 and 4).

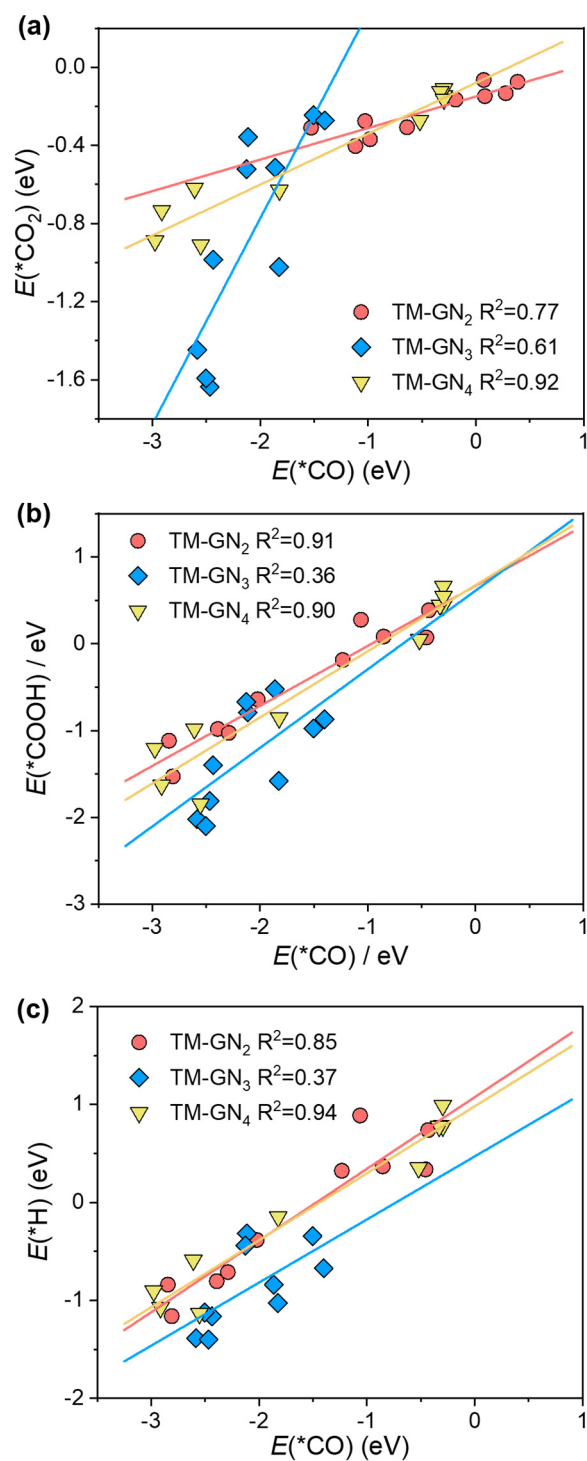

**Figure S3.** Calculated scaling relationship about the adsorption energy of key intermediates in terms of the descriptor  $E(*CO)$ .

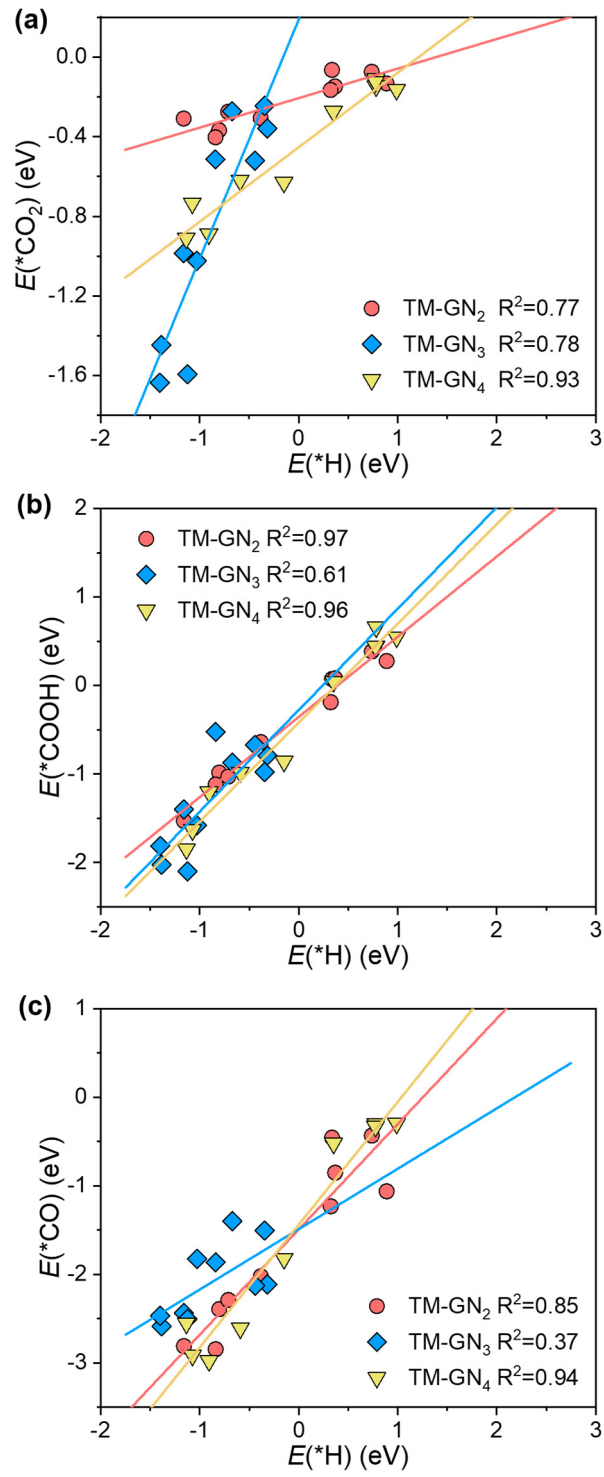

**Figure S4.** Calculated scaling relationship about the adsorption energy of key intermediates in terms of the descriptor  $E^*(\text{H})$ .

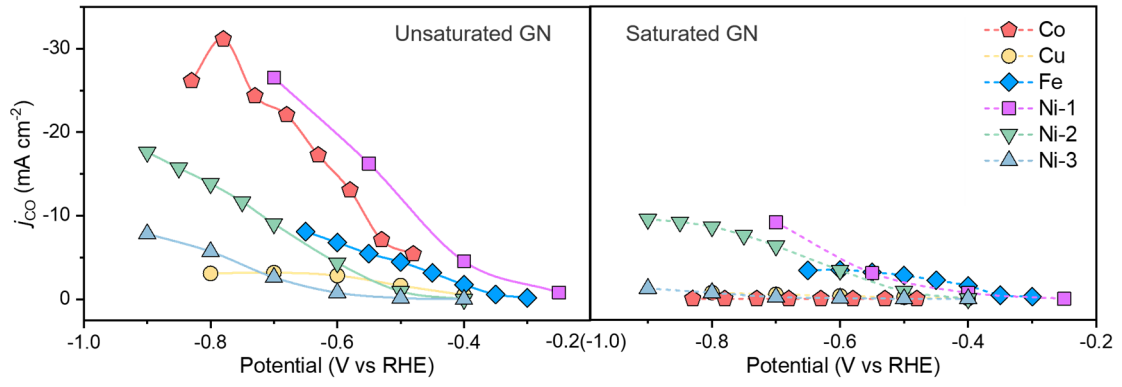

**Figure S5.** Partial current densities of CO on Fe (ref 65), Co (ref 66), Ni (ref 32, 36 and 58) and Cu (ref 34) SACs reported in experiments.

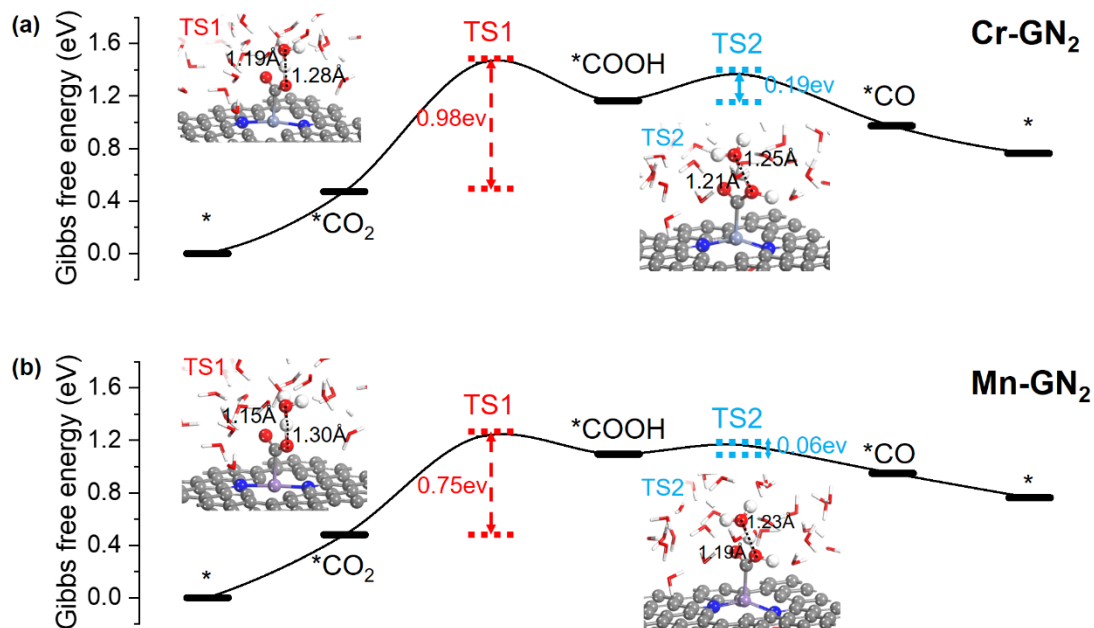

**Figure S6.** Energy profiles with the activation barriers considered of CO<sub>2</sub>RR to CO on the unsaturated N-coordinated Cr-GN<sub>2</sub> (a), Mn-GN<sub>2</sub> (b), and the optimized structures of the transition states (TS) of the \*CO<sub>2</sub> hydrogenation into \*COOH (\*CO<sub>2</sub> + H<sup>+</sup>/e<sup>-</sup> → \*COOH) and \*COOH hydrogenation into \*CO (\*CO<sub>2</sub> + H<sup>+</sup>/e<sup>-</sup> → \*CO + H<sub>2</sub>O). All of the TS were searched by a constrained optimization scheme.<sup>7,8</sup>

## Reference

1. J. K. Nørskov, J. Rossmeisl, A. Logadottir, L. Lindqvist, J. R. Kitchin, T. Bligaard and H. Jónsson, *J. Phys. Chem. B*, 2004, **108**, 17886.
2. A. J. Garza, A. T. Bell and M. Head-Gordon, *ACS Catal.*, 2018, **8**, 1490.
3. R. Sundararaman and W. A. Goddard, 3rd, *J Chem. Phys.*, 2015, **142**, 064107.
4. R. Sundararaman, K. Letchworth-Weaver, K. A. Schwarz, D. Gunceler, Y. Ozhables and T. A. Arias, *Softwarex*, 2017, **6**, 278-284.
5. X. Guo, J. Gu, S. Lin, S. Zhang, Z. Chen and S. Huang, *J. Am. Chem. Soc.*, 2020, **142**, 5709-5721.
6. C. Y. Lin, L. Zhang, Z. Zhao and Z. Xia, *Adv. Mater.*, 2017, **29**, 1606635.
7. H. Yuan, N. Sun, J. Chen, J. Jin, H. Wang and P. Hu, *ACS Catalysis*, 2018, **8**, 9269-9279.
8. D. Wang, T. Sheng, J. Chen, H.-F. Wang and P. Hu, *Nature Catalysis*, 2018, **1**, 291-299.
